# Supplementary material for: A bi-specific lectin from the mushroom Boletopsis grisea and its application in glycoanalytical workflows
Source: PubMed Central journal article supplement (PMC7794217; doi:10.1038/s41598-020-80488-7), 2021-01-08
Supplement: 41598_2020_80488_MOESM1_ESM.pdf [file 41598_2020_80488_MOESM1_ESM.pdf]

## **Supplemental Information**

### **A bi-specific lectin from the mushroom *Boletopsis grisea* and its application in glycoanalytical workflows**

Mehul B. Ganatra, Vladimir Potapov, Saulius Vainauskas, Anthony Z. Francis, Colleen M. McClung, Cristian I. Ruse, Jennifer L. Ong and Christopher H. Taron\*

New England Biolabs, Inc., 240 County Road, Ipswich, MA 01938, USA

\*Corresponding Author: Christopher Taron, 240 County Road, Ipswich, MA 01938, USA,  
Phone: (978) 380-7207, Fax: (978) 921-1350, Email: taron@neb.com

**This document provides information supplemental to the main text, in the following sections:**

**A - Supporting Experimental Section**

**B - Supporting Tables and Figures**

## A - Supporting Experimental Section

### Native lectin purification

Purification of the native mushroom GlcNAc-binding lectin was conducted using a procedure described by Koyama *et al.* with some modifications. Fruit body (175 g) was homogenized in 200 mL of Buffer A (50 mM Tris-HCl, pH 7.5 containing 0.1 M NaCl, 1 mM EDTA, and Complete EDTA-free Protease Inhibitor Cocktail (Roche Diagnostics, Indianapolis, IN) at a concentration of 1 tablet per 50 mL buffer) using an electric tissue grinder. The homogenate was centrifuged for 10 min at 13,000 x *g*. Ammonium sulfate was added to the supernatant to 70% saturation. Precipitated proteins were dissolved in 30 mL Buffer A and residual insoluble material was removed by centrifugation for 10 min at 13,000 x *g*. The protein suspension was dialyzed using a 6-8 kDa MWCO membrane (Thermo-Fisher Scientific, Chelmsford, MA) against 3 L Buffer A lacking protease inhibitors for 2 days (with the buffer being changed after 24 h). Following dialysis, the sample was passed through a 0.22 µm filter. A 10 mL GlcNAc-agarose column was equilibrated with 100 mL Buffer A after which the dialyzed sample was applied. The column was washed with 70 mL Buffer B (50mM Tris-Cl, pH 7.5 containing 0.3 M NaCl, and 1 mM EDTA). The GlcNAc-binding lectin was eluted from the column in Buffer A containing 0.25 M GlcNAc in 4 mL fractions. Fractions containing the purified protein were analyzed on a 10-20% Tris-glycine SDS-PAGE gel (Invitrogen, Carlsbad, CA) using SimplyBlue SafeStain (Thermo-Fisher Scientific). The BGL containing fractions were pooled and dialyzed against 10 mM Tris-HCl, pH 7.5 using a Slide-A-Lyzer Dialysis Cassette (3.5K MWCO) (Thermo-Fisher Scientific).

#### Reference:

Koyama, Y. *et al.* Apoptosis induction by lectin isolated from the mushroom *Boletopsis leucomelas* in U937 cells. *Biosci. Biotechnol. Biochem.* **66**, 784-789 (2002).

### Liquid chromatography mass spectrometry analysis (LC-MS)

The lectin samples were diluted to 100 ng/µl in 0.1% formic acid and analyzed by reverse phase liquid chromatography and electrospray ionization time-of-flight (ESI-TOF) mass spectrometry. A reverse phase HPLC-Chip (Agilent Technologies) was used for the separation of proteins (Vollmer & Goor, 2009). The custom chip contained an integrated trapping column with a 40 nl capacity, a separation column (75 µm x 150 mm), both packed with PLRP-S 5 µm particles (1000 Å pore size), and a nano-ESI emitter. The proteins were loaded onto the chip trapping column at 4 µl/min and eluted over the separation column at a flow rate of 500 nl/min using an Agilent 1200 series nano LC coupled to an Agilent ChipCube and 6210 series ESI-TOF mass spectrometer. The column was equilibrated with 15% acetonitrile/0.1% formic acid in water. For each protein, one µL of sample was injected onto the column. After two minutes, the protein was eluted over a ten-minute linear gradient from 15% to 90% acetonitrile (held at 90% acetonitrile

for five minutes). The proteins eluted at approximately thirteen minutes after injection. The mass spectra were acquired from 100 to 3200 m/z using an ionization energy of 1800 V, fragmentation energy of 215 V and drying gas of 325°C at 4.0 L/min. The spectra were extracted and deconvoluted with Agilent MassHunter Qualitative Analysis using BioConfirm B 2.0.2 software with a mass range of 10k to 50k Daltons.

Reference:

Vollmer, M. & van de Goor, T. HPLC-Chip/MS technology in proteomic profiling. *Methods Mol Biol.* **544**, 3–15, (2009).

## **B – Supporting Tables and Figures**

### **Supplementary Table 1 and Tables 3-6. Raw CFG glycan microarray binding data for rBGL and each BGL mutant.**

Note: Table 1 and Table 3-6 data is provided in an Excel spreadsheet that has been uploaded as a separate file. Each tab within the spreadsheet represents binding data for a separate BGL protein.



**Supplementary Table 2.** Mutants predicted to disrupt ligand binding in BGL.

| Position                               | Original residue | Mutated residue  | $\Delta\Delta G_{binding}$ score <sup>1</sup> |
|----------------------------------------|------------------|------------------|-----------------------------------------------|
| <b>Primary binding site (GalNAc)</b>   |                  |                  |                                               |
| 107                                    | ARG              | TYR <sup>2</sup> | 17.84                                         |
| 49                                     | GLY              | HIS <sup>2</sup> | 16.59                                         |
| 49                                     | GLY              | ASN              | 6.40                                          |
| 71                                     | HIS              | GLU              | 6.21                                          |
| 72                                     | ASN              | LYS              | 6.10                                          |
| 48                                     | SER              | LYS              | 5.72                                          |
| 28                                     | TYR              | SER              | 5.71                                          |
| 49                                     | GLY              | LYS <sup>3</sup> | 4.28                                          |
| 72                                     | ASN              | PRO <sup>3</sup> | 4.09                                          |
| 48                                     | SER              | ASP <sup>3</sup> | 3.68                                          |
| <b>Secondary binding site (GlcNAc)</b> |                  |                  |                                               |
| 103                                    | ARG              | GLU <sup>3</sup> | 17.24                                         |
| 103                                    | ARG              | TYR              | 12.63                                         |
| 78                                     | ASP              | ARG <sup>3</sup> | 7.91                                          |
| 80                                     | VAL              | ASP              | 6.49                                          |
| 81                                     | THR              | ILE              | 5.60                                          |
| 81                                     | THR              | PRO              | 3.90                                          |
| 78                                     | ASP              | TRP <sup>3</sup> | 2.73                                          |
| 116                                    | VAL              | ASP <sup>3</sup> | 2.40                                          |
| 78                                     | ASP              | LYS <sup>3</sup> | 2.17                                          |
| 114                                    | TYR              | TRP <sup>4</sup> | -10.93                                        |

<sup>1</sup> Mutants are ranked by  $\Delta\Delta G_{binding}$  score, which is a difference between predicted MM-GBSA  $\Delta G_{binding}$  scores of the mutant and the wild-type protein. A positive  $\Delta\Delta G_{binding}$  value indicates that a mutant binds ligand in a respective binding site weaker than the wild-type protein. Mutants were predicted to disrupt binding in a respective binding site (see Materials and Methods for details); no change in binding was assumed for the alternative binding site.

<sup>2</sup> Mutant proteins did not show any expression.

<sup>3</sup> Mutant proteins were either insoluble or showed very low solubility.

<sup>4</sup> Y114W was used as a test mutation predicted to stabilize ligand binding.

**Supplementary Table 7. O-glycan structures observed from fetuin.** The numbers represent the relative abundance of each O-glycan structure.

| Glycans                                         | Non-enriched |              | BGLwt        |              | BGLmut       |              |
|-------------------------------------------------|--------------|--------------|--------------|--------------|--------------|--------------|
|                                                 | Biol. Rep. 1 | Biol. Rep. 2 | Biol. Rep. 1 | Biol. Rep. 2 | Biol. Rep. 1 | Biol. Rep. 2 |
| HexNAc(1)                                       |              | 4.86         | 1.28         | 1.92         | 1.70         | 1.43         |
| HexNAc(1)Hex(1)                                 |              | 0.88         | 1.32         | 0.87         | 1.58         | 1.83         |
| HexNAc(1)Hex(1),HexNAc(1)Hex(1)                 |              |              |              |              | 0.06         | 0.06         |
| HexNAc(1)Hex(1)NeuAc(1)                         | 9.67         | 25.04        | 31.56        | 32.35        | 49.48        | 55.73        |
| HexNAc(1)Hex(1)NeuAc(2)                         | 72.94        | 51.36        | 51.52        | 51.17        | 35.66        | 33.46        |
| HexNAc(1)Hex(1)NeuAc(2),HexNAc(1)Hex(1)NeuAc(2) | 0.15         |              |              |              |              |              |
| HexNAc(1)Hex(1)NeuGc(1)                         |              |              | 0.42         | 1.54         | 1.64         | 1.26         |
| HexNAc(1)Hex(1)NeuGc(1)NeuAc(1)                 | 2.06         | 2.74         | 1.72         | 1.86         | 1.26         | 1.21         |
| HexNAc(1)Hex(1)NeuGc(2)                         | 8.20         | 5.53         | 5.15         | 5.00         | 3.49         | 3.47         |
| HexNAc(2)Hex(1)NeuAc(1)                         |              |              |              |              | 0.42         |              |
| HexNAc(2)Hex(2)NeuAc(1)                         | 0.41         | 1.58         | 1.66         | 1.34         | 1.75         | 1.10         |
| HexNAc(2)Hex(2)NeuAc(1),HexNAc(2)Hex(2)NeuAc(1) |              |              |              |              | 0.06         |              |
| HexNAc(2)Hex(2)NeuAc(2)                         | 6.49         | 8.03         | 5.39         | 3.95         | 2.90         | 0.46         |
| HexNAc(2)Hex(2)NeuAc(2),HexNAc(2)Hex(2)NeuAc(2) | 0.09         |              |              |              |              |              |

**Supplementary Table 8.** Primers used in this study.

| <b>Primer</b> | <b>Sequence</b>            | <b>Use</b> |
|---------------|----------------------------|------------|
| R107Y-F       | AGCATACGCAtacGAGAAGCAACTCG | PCR        |
| R107Y-R       | CTCGGTCCATCATTGTAG         | PCR        |
| G49H-F        | GGGTGGCAGCcacACCTCCGGCA    | PCR        |
| G49H-R        | ATGGTGAGCACCTTCTCCC        | PCR        |
| G49N-F        | GGGTGGCAGCaacACCTCCGGCA    | PCR        |
| G49N-R        | ATGGTGAGCACCTTCTCCC        | PCR        |
| H71E-F        | TTTGGGCGTTgaaACAATAAGC     | PCR        |
| H71E-R        | GCGACGATGAAGTCTTCG         | PCR        |
| N72K-F        | GGGCGTTCACaaaAATAAGCGGT    | PCR        |
| N72K-R        | AAAGCGACGATGAAGTCTTCG      | PCR        |
| S48K-F        | CATGGGTGGCaaaGGAACCTCCGG   | PCR        |
| S48K-R        | GTGAGCACCTTCTCCCCG         | PCR        |
| Y28S-F        | CGTCTGGAACtccGCCAATGGTG    | PCR        |
| Y28S-R        | GTCTGCTCAACGATCCTG         | PCR        |
| G49K-F        | GGGTGGCAGCaaaACCTCCGGCA    | PCR        |
| G49K-R        | ATGGTGAGCACCTTCTCCC        | PCR        |
| N72P-F        | GGGCGTTCACccgAATAAGCGGTG   | PCR        |
| N72P-R        | AAAGCGACGATGAAGTCTTC       | PCR        |
| S48D-F        | CATGGGTGGCgacGGAACCTCCG    | PCR        |
| S48D-R        | GTGAGCACCTTCTCCCCG         | PCR        |
| R103E-F       | TGATGGACCGgaaGCATACGCAAG   | PCR        |
| R103E-R       | TTGTAGTACTGGGGGTTG         | PCR        |
| R103Y-F       | TGATGGACCGtacGCATACGCAAG   | PCR        |
| R103Y-R       | TTGTAGTACTGGGGGTTG         | PCR        |
| D78R-F        | GCGGTGGTGcgcATCGTCACGA     | PCR        |
| D78R-R        | TTATTGTTGTGAACGCCCAAAG     | PCR        |
| V80D-F        | GTGCGACATCgacACGAGCCTCG    | PCR        |
| V80DR         | CACCGCTTATTGTTGTGAACGC     | PCR        |
| V80D-F        | GTGCGACATCgacACGAGCCTCG    | PCR        |
| V80D-R        | CACCGCTTATTGTTGTGAACGC     | PCR        |
| T81I-F        | CGACATCGTCatcAGCCTCGCTG    | PCR        |
| T81I-R        | CACCACCGCTTATTGTTG         | PCR        |
| T81P-F        | CGACATCGTCccgAGCCTCGCTG    | PCR        |
| T81P-R        | CACCACCGCTTATTGTTGTGAAC    | PCR        |
| D78W-F        | GCGGTGGTGctggATCGTCACGAG   | PCR        |



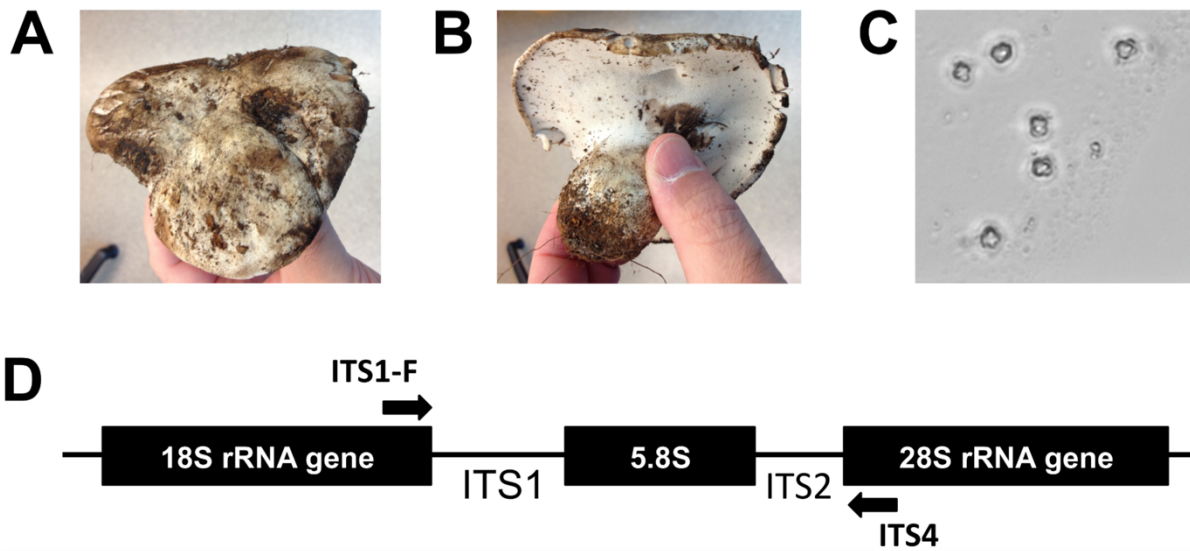

**Figure S1. Morphological and molecular mushroom speciation.** The sourced mushroom had dark gray and brown caps (**A and B**) and produced a spore print (**C**) of small elliptical bumpy spores. (**D**) A schematic depicting the fungal internal transcribed spacers (ITS). The regions that lie between the 18S ribosomal RNA gene (rRNA) and 5.8S rRNA gene (ITS1) and between the 5.8S rRNA gene and 28 rRNA gene (ITS2) were amplified using primers ITS1-F and ITS4 primers.

|                        |                                                                 |     |
|------------------------|-----------------------------------------------------------------|-----|
| Sourced mushroom       | -ACCTGCGGAAGGATCATTAATGAAATGAAGCATGTGAAGGGTTGTAGCTGGTCTCTTTT    | 59  |
| <i>B. grisea</i>       | -ACCTGCGGAAGGATCATTAATGAAATGAAGCATGTGAAGGGTTGTAGCTGGTCTCTTTT    | 59  |
| <i>B. leucomelaena</i> | AACCTGCGGAAGGATCATTAATGAAATGAAGCATGTGAAGGGTTGTAGCTGGCTCTTTT     | 60  |
| Sourced mushroom       | TTGGAGGCATGTGCACGCCCGGATCATTCATCCCCTCACACACCTGTGCACAACCTGTA     | 119 |
| <i>B. grisea</i>       | TTGGAGGCATGTGCACGCCCGGATCATTCATCCCCTCACACACCTGTGCACAACCTGTA     | 119 |
| <i>B. leucomelaena</i> | CTGGAGGCATGTGCACGCCCTGGATCATTCATCCCCTCACACACCTGTGCACAACCTGTA    | 120 |
| Sourced mushroom       | GCTTGGGATGATCACGGAGGCCATCTTTTTTGGTGGCGCCGAATGCCCTTGCTATGATC     | 179 |
| <i>B. grisea</i>       | GCTTGGGATGATCACGGAGGCCATCTTTTTTGGTGGCGCCGAATGCCCTTGCTATGATC     | 179 |
| <i>B. leucomelaena</i> | GCTTGGGATGATCACGGAGGCCCTGCTCTTC--TGGTGGCAACCGAATGCCCTTGCTATGATC | 178 |
| Sourced mushroom       | TTTTGATACACACCTTTATAACGTTTATGTTGATGACATTATTTTGAACGGTAATACAAC    | 239 |
| <i>B. grisea</i>       | TTTTGATACACACCTTTATAACGTTTATGTTGATGACATTATTTTGAACGGTAATACAAC    | 239 |
| <i>B. leucomelaena</i> | TTTTGATACACACCTTTATAACGTTTATGTTGATGACATTATTTTGAATGTAAATACAAC    | 238 |
| Sourced mushroom       | TTTCAGCAACGGATCTCTTGGCTCTCGCATCGATGAAGAACGCAGCGAAATGCGATAAGT    | 299 |
| <i>B. grisea</i>       | TTTCAGCAACGGATCTCTTGGCTCTCGCATCGATGAAGAACGCAGCGAAATGCGATAAGT    | 299 |
| <i>B. leucomelaena</i> | TTTCAGCAACGGATCTCTTGGCTCTCGCATCGATGAAGAACGCAGCGAAATGCGATAAGT    | 298 |
| Sourced mushroom       | AATGTGAATTGCAGAAATTCAGTGAATCATCGAATCTTTGAACGCACCTTGCACTCCTTGG   | 359 |
| <i>B. grisea</i>       | AATGTGAATTGCAGAAATTCAGTGAATCATCGAATCTTTGAACGCACCTTGCACTCCTTGG   | 359 |
| <i>B. leucomelaena</i> | AATGTGAATTGCAGAAATTCAGTGAATCATCGAATCTTTGAACGCACCTTGCACTCCTTGG   | 358 |
| Sourced mushroom       | TATTCCGAGGAGTATGCCTGTTTGGAGCGTCATGAAATTCTCAACTGCCTTGGCCTTTTGT   | 419 |
| <i>B. grisea</i>       | TATTCCGAGGAGTATGCCTGTTTGGAGCGTCATGAAATTCTCAACTGCCTTGGCCTTTTGT   | 419 |
| <i>B. leucomelaena</i> | TATTCCGAGGAGTATGCCTGTTTGGAGTGCATGAAATTCTCAACTGCCTTGGCCTTTTGT    | 418 |
| Sourced mushroom       | GCCAAAGTGAAGTTGGATTTGGAGGTTTGTGCTGGCATGGAGCGTCTGGTTGATGCTT      | 479 |
| <i>B. grisea</i>       | GCCAAAGTGAAGTTGGATTTGGAGGTTTGTGCTGGCATGGAGCGTCTGGTTGATGCTT      | 479 |
| <i>B. leucomelaena</i> | GCCAAAGTGAAGTTGGATTTGGAGGTTTGTGCTGGCATGGAGCGTCTGATTGATGCTT      | 478 |
| Sourced mushroom       | GCT-TGTTGGCTCCTCCTAAATGCATGCAGAGCTTGGCAAAGCGGCTCGATGTGATAAT     | 538 |
| <i>B. grisea</i>       | GCT-TGTTGGCTCCTCCTAAATGCATGCAGAGCTTGGCAAAGCGGCTCGATGTGATAAT     | 538 |
| <i>B. leucomelaena</i> | GCTGTGTTGGCTCCTCCTAAAGCATGCAGAGCTTGGCAAAGCGGCTCGATGTGATAAT      | 538 |
| Sourced mushroom       | TATCTACATTGTCGTCAAATTTGTGCAAATCTGCTGTGGGGTTGCGAC-TTTATGAACAA    | 597 |
| <i>B. grisea</i>       | TATCTACATTGTCGTCAAATTTGTGCAAATCTGCTGTGGGGTTGCGAC-TTTATGAACAA    | 597 |
| <i>B. leucomelaena</i> | TATCTACCTTGTGTCGTCGAAGTGTGCAATCTGCTGTGGGG--TGTGACCTTTTGAACAA    | 596 |
| Sourced mushroom       | TTTGACCTCAAATCAGGTAGGACTACCCGCTGA-----                          | 630 |
| <i>B. grisea</i>       | TTTGACCTCAAATCAGGTAGGACTACCCGCTGAACCTAAGCATATCAATAAGCGGAGGA     | 656 |
| <i>B. leucomelaena</i> | TTTGACCTCAAATCAGGTAGGACTACCCGCTGAACCTAAGCATATCAATAAGCGGAGGA     | 655 |

**Figure S2. Nucleic acid sequence alignment of the ITS region of *Boletopsis* mushrooms.** ClustalW was used to align DNA sequences of the ITS amplicon from the sourced mushroom (as described in Figure S1) and sequences of the same region from *B. grisea* (Accession No. EF457902) and *B. leucomelaena* (Accession No. DQ408771) present in GenBank. ITS1 and ITS2 are depicted with green and yellow highlights, respectively. The ITS sequences of the sourced mushroom and *B. grisea* are identical. Sequence positions in ITS1 and ITS2 that are different between the sourced mushroom and *B. leucomelaena* are shown indicated by blue highlight. Gaps introduced by ClustalW to yield the best alignment are depicted with hyphens.

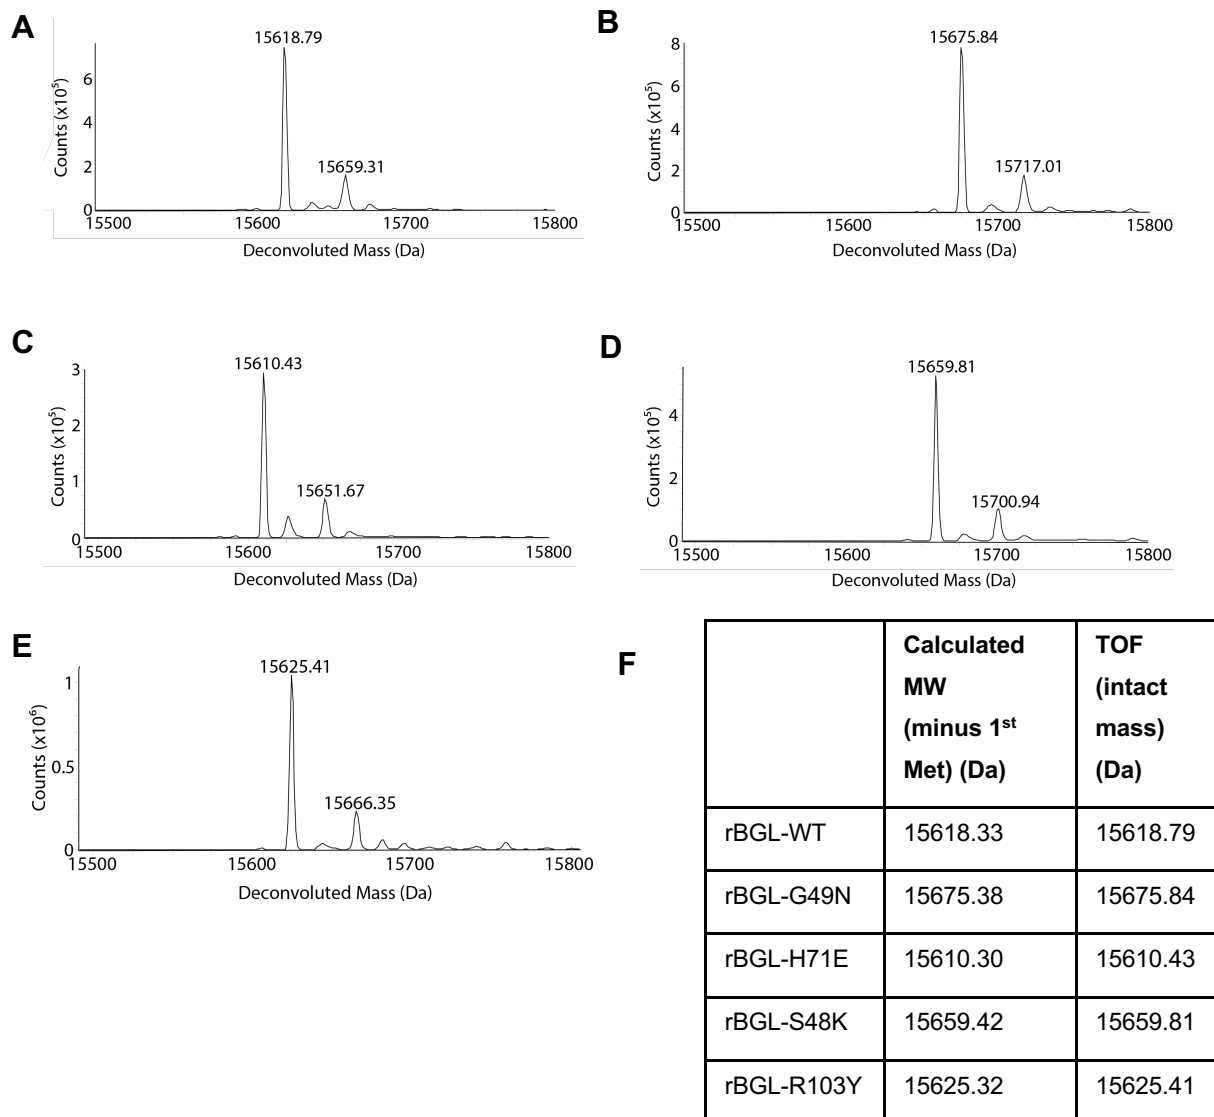

**Figure S3. Acquired mass spectra of rBGL and mutants.** Samples were analyzed by reverse phase liquid chromatography (LC) and electrospray ionization time-of-flight mass spectrometry (ESI-TOF MS). **(A)** recombinant BGL; **(B)** G49N mutant; **(C)** H71E mutant; **(D)** S48K mutant; **(E)** R103Y mutant; The additional peaks are within range of common modifications such as oxidation and acetylation. **(F)** The intact mass obtained for each protein corresponded to the calculated molecular weight lacking the initiating methionine using the ExPASy Compute pI/Mw tool ([https://web.expasy.org/compute\\_pi/](https://web.expasy.org/compute_pi/)).

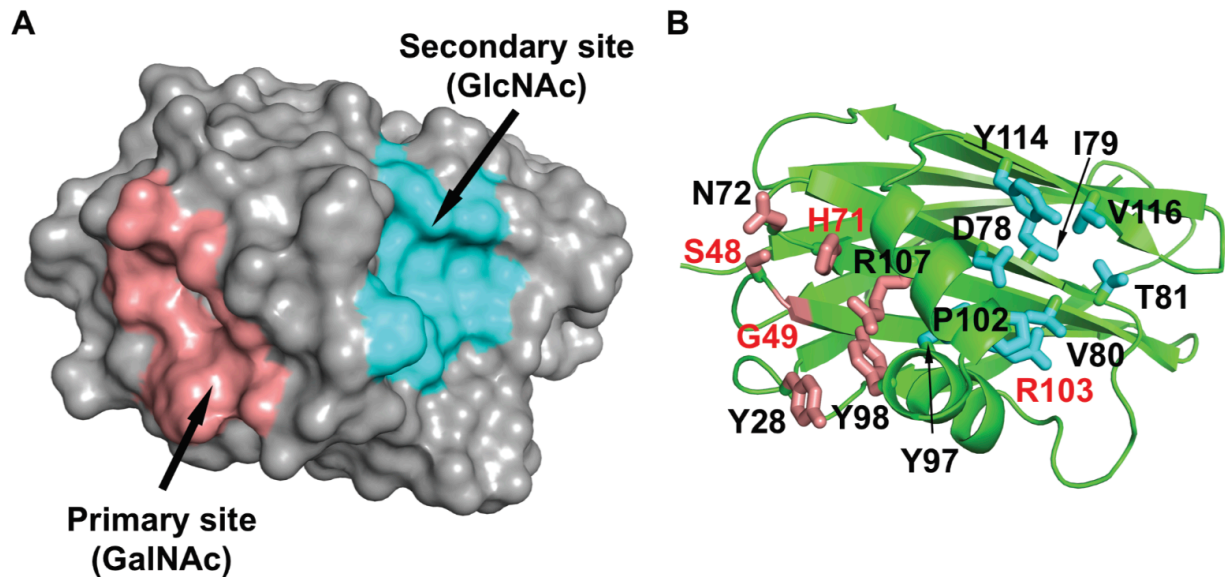

**Figure S4. The overall structural model of rBGL. (A)** Primary and secondary ligand binding sites are located on the same side of the protein. **(B)** Seven and nine residues comprise the binding pockets for GalNAc and GlcNAc monosaccharides, respectively. Four amino acids (in red) were individually mutated to disrupt binding in the respective pockets. These positions are shown in greater detail in Figure 3 of the main text. Molecular graphic images were generated using PyMOL software ([www.pymol.org](http://www.pymol.org)) by V. Potapov.



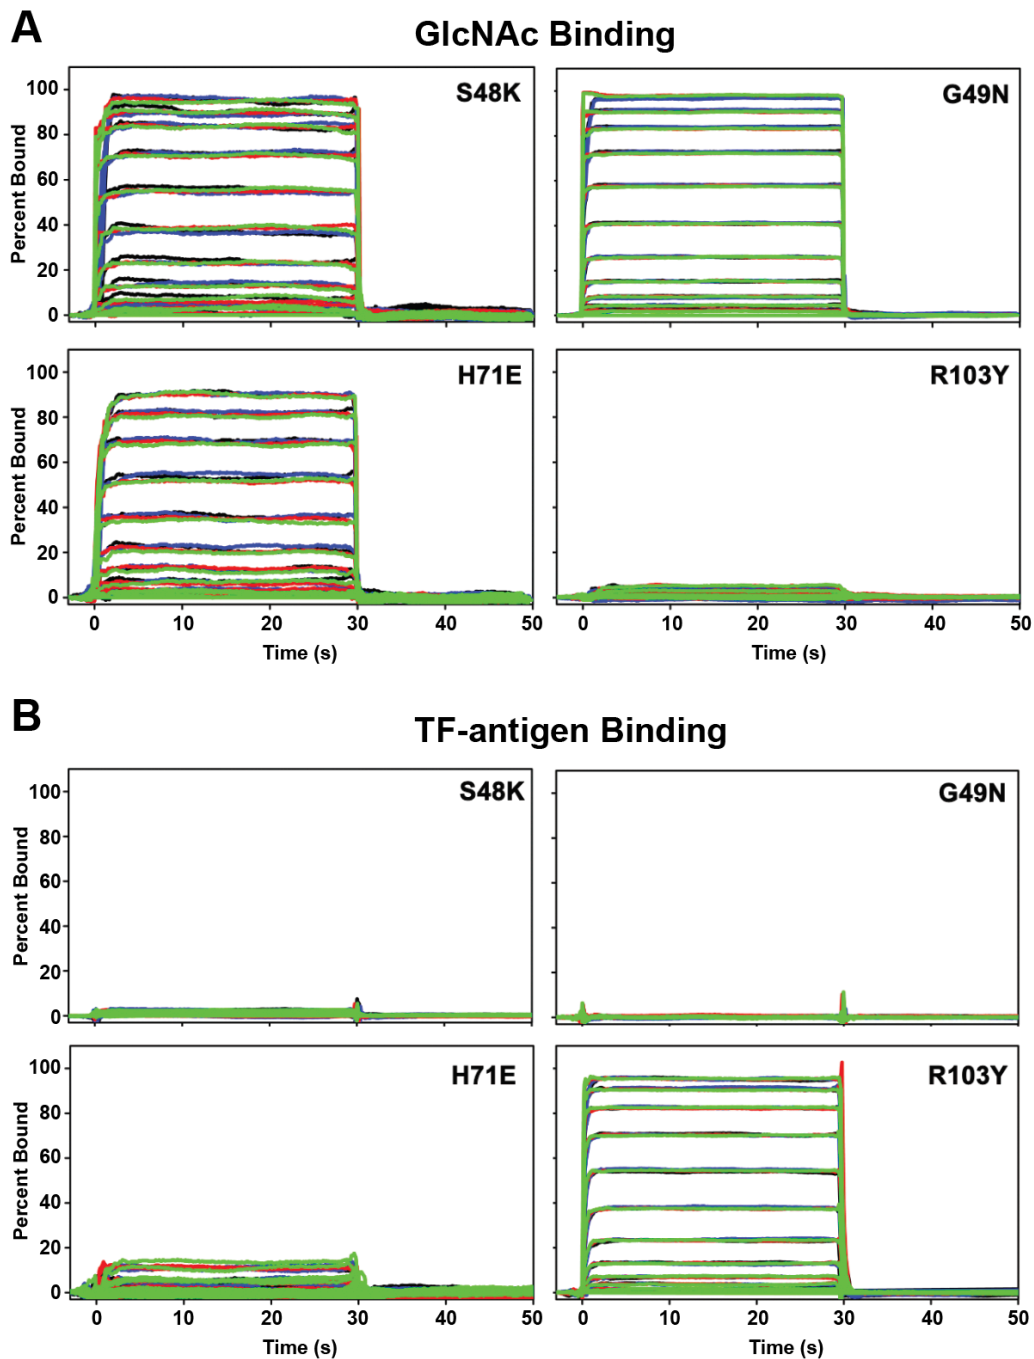

**Figure S5. SPR binding analysis of BGL mutants. (A)** GlcNAc and **(B)** TF-antigen were tested for binding to immobilized BGL mutants (S48K, G49N, H71E, and R103Y) using a 2-fold concentration series up to 10 mM and 2 mM, respectively. Shown are sensorgrams captured for 8 replicate binding experiments (overlaid colored lines). For all experiments, equilibrium curves for binding data are shown in Supplemental Figure S6.

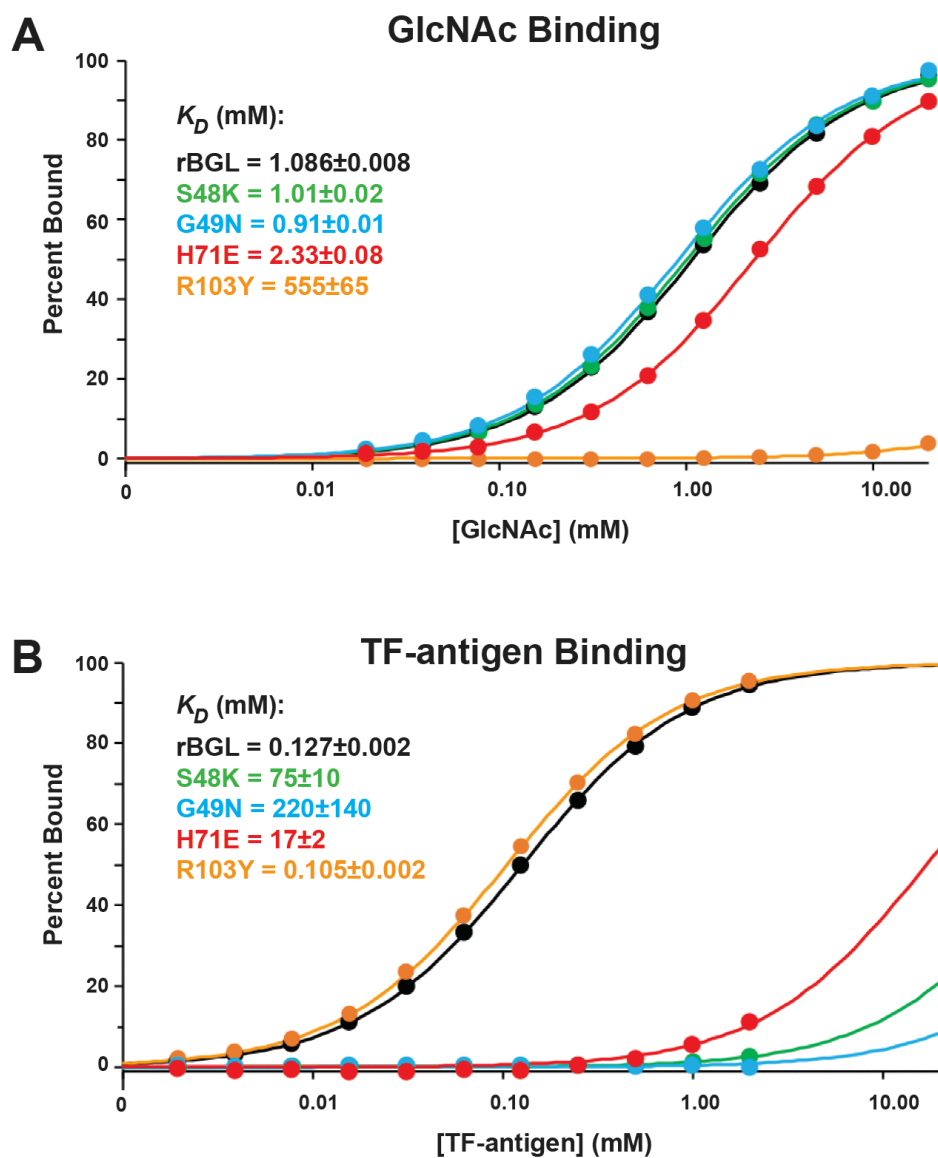

**Figure S6. SPR equilibrium data of BGL mutants.** For (A) GlcNAc and (B) TF-antigen binding data presented in Supplemental Figure S9, equilibrium dissociation binding constants were determined by fitting the data at equilibrium to a 1:1 interaction model using the software Scrubber 2.

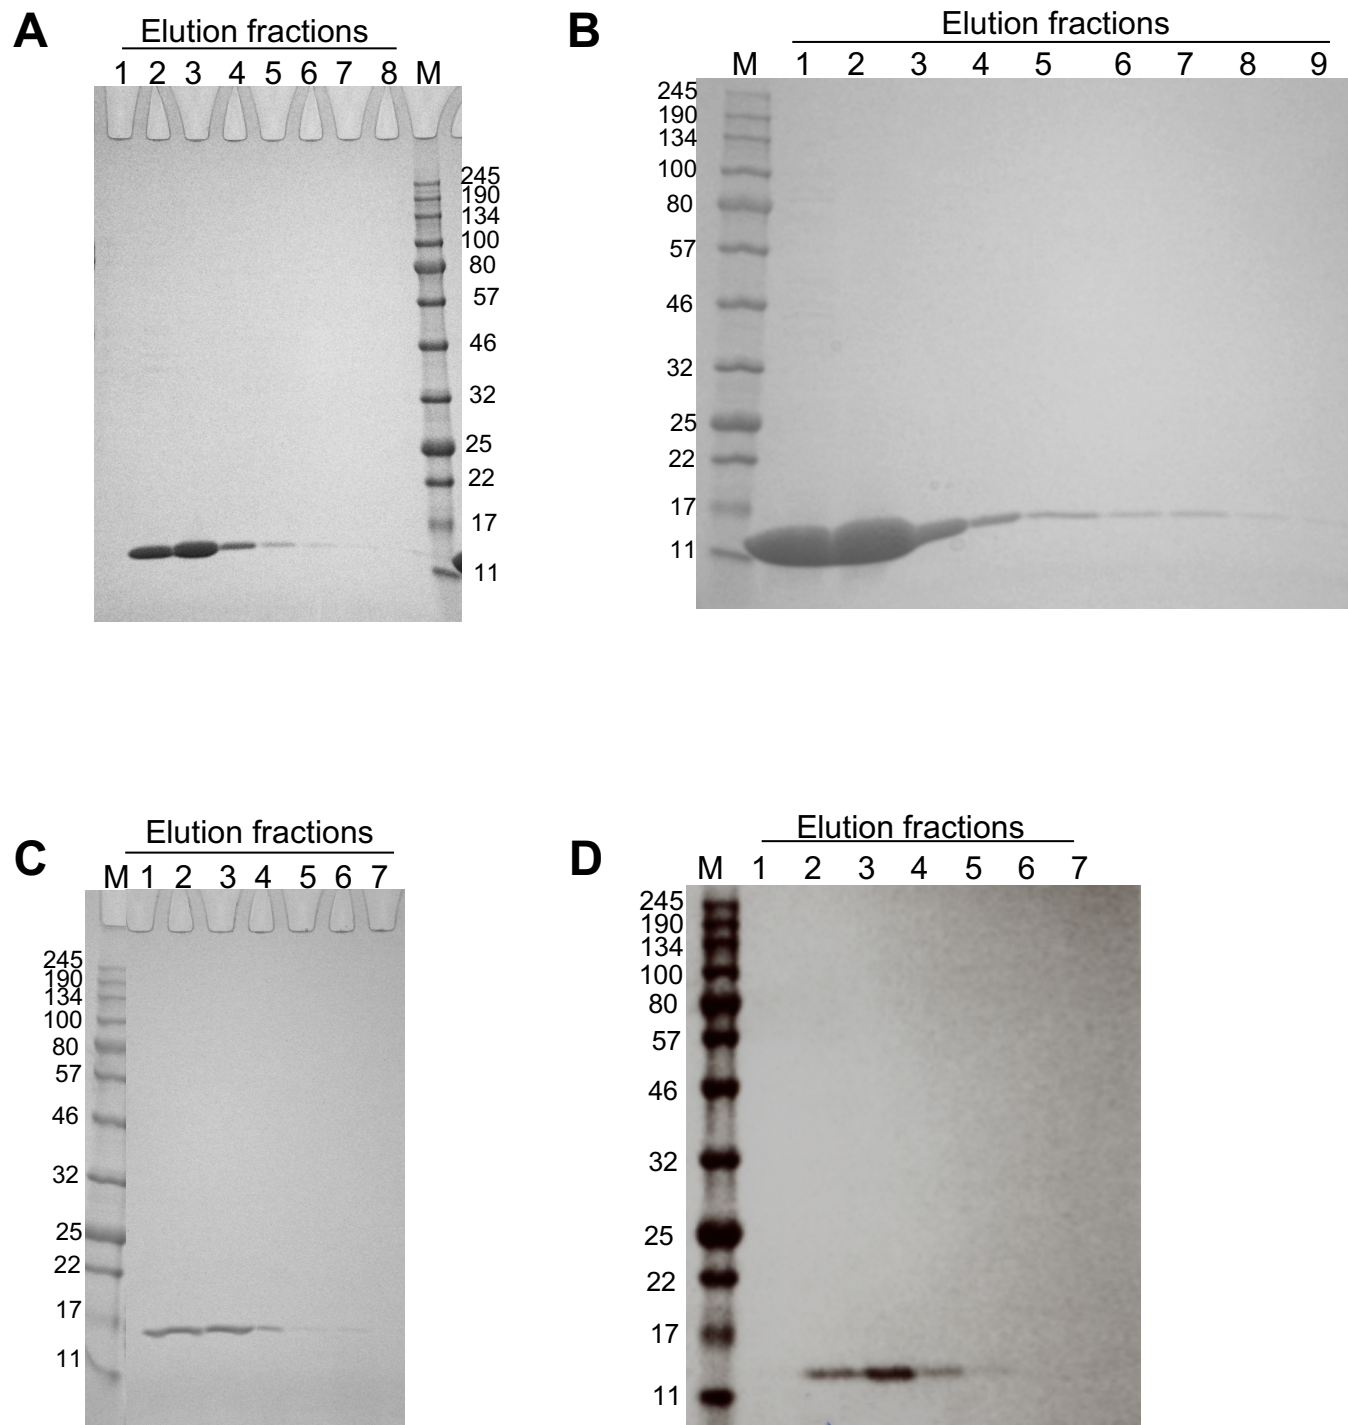

**Figure S7. Purification of recombinant BGL mutants.** SDS-PAGE of the elution fractions from large scale purifications (1-6 L cultures) are shown. Mutants G49N (**A**), H71E (**B**) and S48K (**C**) were each passed over a GlcNAc-agarose column while R103Y (**D**) was purified using a Gal $\beta$ 1,3GalNAc-agarose column. M, a broad range pre-stained protein standard (kDa, New England Biolabs #P7712S).

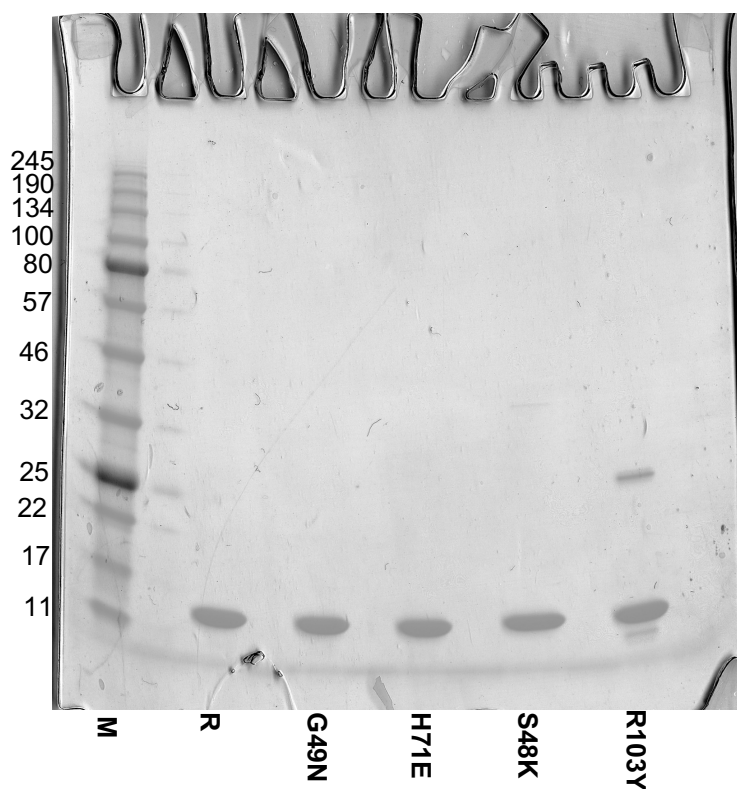

**Figure S8. Purified proteins used for SPR analysis.** Shown is the uncropped gel image of the purified proteins used for surface plasmon resonance (SPR). Protein concentration was determined by Bradford assay and 5  $\mu\text{g}$  of each protein was separated by SDS-PAGE. Recombinant BGL (R) and mutants G49N, H71E and S48K were purified by affinity chromatography using GlcNAc agarose (as described in Materials and Methods in the main text), and mutant R103Y was purified using Gal $\beta$ 1,3GalNAc-agarose. M, broad range pre-stained protein standard (kDa, New England Biolabs #P7712S).

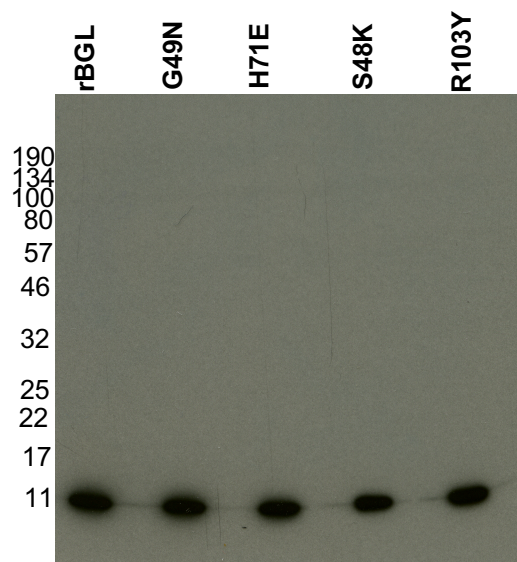

**Figure S9. Western blot analysis of purified proteins.** Shown is a Western blot of the purified BGL proteins. Protein concentration was determined by Bradford assay and 100 ng of each protein was separated by SDS-PAGE and transferred to nitrocellulose membrane. A western blot assay was performed using an anti-BGL antibody (1:1000 in 3% non-fat dry milk/PBS-T) followed by anti-rabbit HRP linked (1:2000 in 3% non-fat dry milk/ PBS-T). Numbers reflect the size (kDa) and position of the proteins from a broad range pre-stained protein standard (New England Biolabs #P7712S).

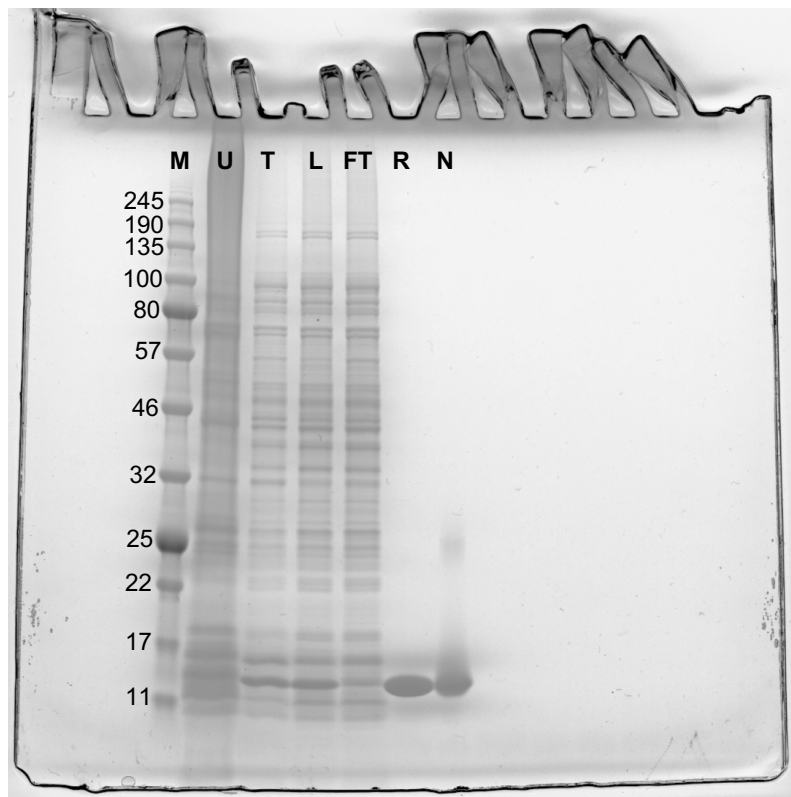

**Figure S10. SDS-PAGE of *E. coli* expressed and purified recombinant BGL.** Shown here is the uncropped gel image presented in Figure 1 of the main text. *E. coli*-expressed and purified recombinant BGL was visualized by separation via 10-20% Tris-glycine SDS-PAGE and SimplyBlue staining. M: M, broad range pre-stained protein standard (kDa, New England Biolabs #P7712S); U: uninduced lysate; T: total induced lysate; L: soluble lysate; FT: column flow-through; R: purified recombinant BGL; N: purified native BGL.

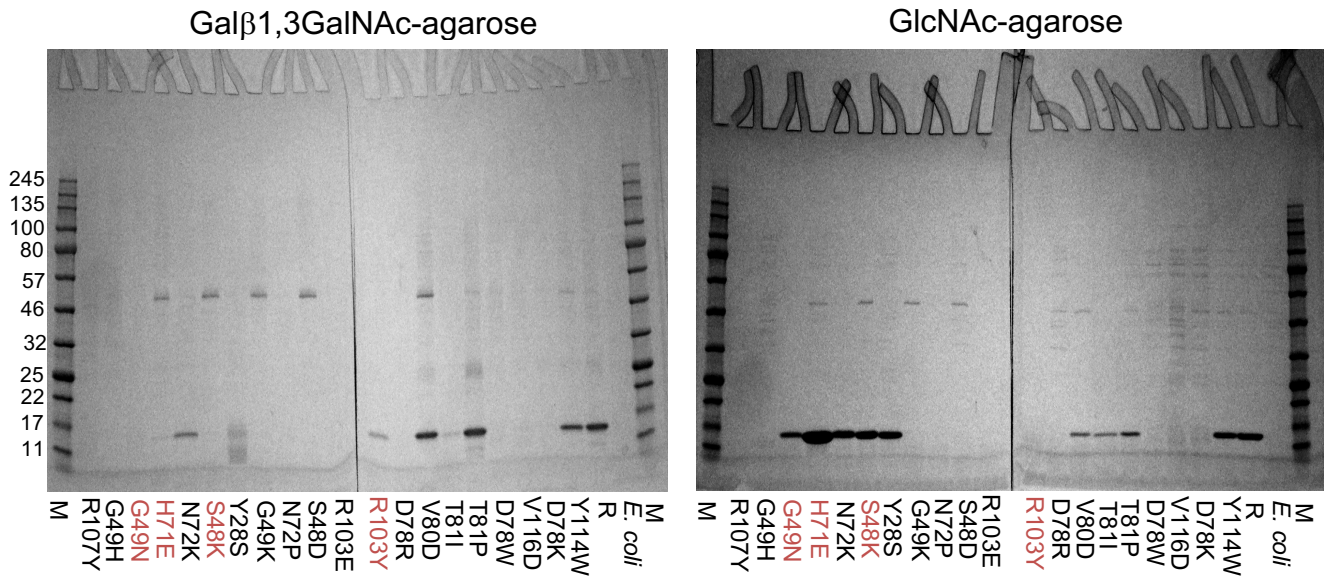

**Figure S11. Qualitative assessment of mutant lectin specificity.** Shown here are the uncropped gel images presented in Figure 3 of the main text. Computationally predicted mutants that disrupt each binding site were created by site-directed mutagenesis and expressed in *E. coli*. Aliquots of each lysate were separately passed over Gal $\beta$ 1,3GalNAc-agarose and GlcNAc-agarose columns. Proteins that bound to each column were eluted and separated by SDS-PAGE. Mutants G49N, H71E and S48K bound to GlcNAc but not Gal $\beta$ 1,3GalNAc-agarose. Mutant R103Y bound to Gal $\beta$ 1,3GalNAc but not GlcNAc-agarose. Recombinant BGL (R) and *E. coli* extract were used as controls. Orange text denotes mutants with differential binding ability. M, broad range pre-stained protein standard (kDa, New England Biolabs #P7712S).
